# Supplementary material for: Divalent cations activate TRPV1 through promoting conformational change of the extracellular region
Source: PubMed Central journal article supplement — J Gen Physiol. 2014 Jan;143(1):91–103. doi: 10.1085/jgp.201311024 (PMC3874565; doi:10.1085/jgp.201311024), 2014-01
Supplement: supp_jgp.201311024_JGP_201311024_sm.pdf [file supp_jgp.201311024_JGP_201311024_sm.pdf]

Yang et al., <http://www.jgp.org/cgi/content/full/jgp.201311024/DC1>

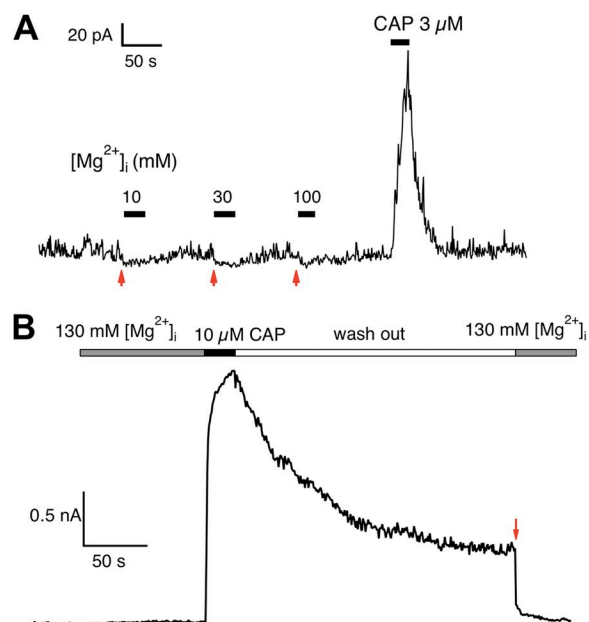

**Figure S1.** Intracellular Mg<sup>2+</sup> exhibits no potentiation effect. (A) Intracellular Mg<sup>2+</sup> appears to inhibit spontaneous single-channel events. (B) Mg<sup>2+</sup> does not activate TRPV1 but inhibits capsaicin-induced current.

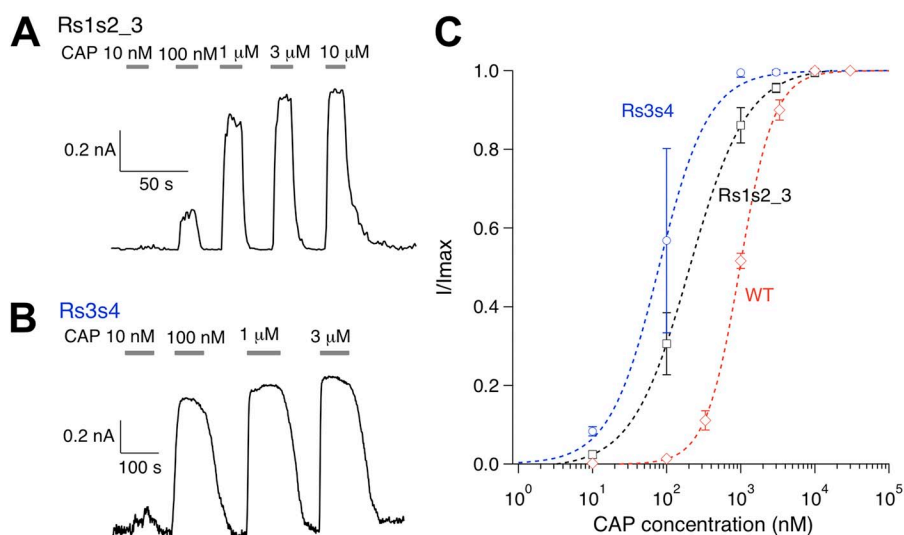

**Figure S2.** Capsaicin activation of extracellular linker mutant channels. (A and B) Representative current traces from Rs1s2\_3 (A) and Rs3s4 (B) in the presence of varying concentrations of capsaicin. (C) Capsaicin dose-response curves for wild type (red), Rs1s2\_3 (black), and Rs3s4 (blue). Superimposed are fits of a Hill equation with the following parameters (EC<sub>50</sub>, slope factor): wild type, 977 nM, 1.88; Rs1s2\_3, 204 nM, 1.1; Rs3s4, 79 nM, 1.3.
